# Supplementary material for: Interactive Role of Silicon on Attenuating Aluminum Toxicity in Sugarcane by Modifying Growth, Root Morphoanatomy, Photosynthetic Pigments, and Gas Exchange Parameters
Source: Research Square preprint supplement (doi:10.21203/rs.3.rs-2662416/v1), 2023-03-16
Supplement: Supplementary file 1 [file 77c7d2c4343b547e7496881c.pdf]

## Supplementary Material

### Interactive Role of Silicon on Attenuating Aluminum Toxicity in Sugarcane by Modifying Growth, Root Morphoanatomy, Photosynthetic Pigments, and Gas Exchange Parameters

Gilmar da Silveira Sousa Junior<sup>1\*</sup>; Alexander Hurtado Calero<sup>2,3</sup>; Rita de Cassia Alves<sup>1</sup>; Eduardo Custodio Gasparino<sup>1</sup>; Durvalina Maria Mathias dos Santos<sup>1</sup>

<sup>1</sup>Department of Biology Applied to Agriculture. School of Agricultural and Veterinarian Sciences. São Paulo State University (UNESP). Via de acesso Prof. Paulo Donato Castellane s/n, P. C. 14884-900, Jaboticabal, São Paulo, Brazil.

<sup>2</sup>Department of Agricultural Production Sciences - Soil and Fertilizer Sector. School of Agricultural and Veterinarian Sciences, São Paulo State University (UNESP). Via de acesso Prof. Paulo Donato Castellane s/n, P. C. 14884-900, Jaboticabal, São Paulo, Brazil.

<sup>3</sup>University of Sancti Spiritus “Jose Marti Perez” (UNISS). Comandante Fajardo, s/n, Olivos 2, P. C. 60100, Sancti Spiritus, Cuba.

\*Corresponding author: E-mail: [gilmar.ssjr@hotmail.com](mailto:gilmar.ssjr@hotmail.com)

#### Supporting information: 2 Figures and 5 Tables

Fig S1 Correlation analysis between [Si] and [Al] in the aerial part of sugarcane seedlings in the cultivars 'CTC9002' a) and 'CTC9003' b).

Fig S2 Number of stomata adaxial in cv 'CTC9002' (a) and cv 'CTC9003' (b) and number of stomata abaxial in cv 'CTC9002' (c) and cv 'CTC9003' (d).

Table S1 Aerial dry mass of both sugarcane cultivars. ANOVA multifactorial with four Al concentrations, two Si levels and their interactions

Table S2 Root dry mass of both sugarcane cultivars. ANOVA multifactorial with four Al concentrations, two Si levels and their interactions

Table S3 Leaf area of both sugarcane cultivars. ANOVA multifactorial with four Al concentrations, two Si levels and their interactions

Table S4 Chlorophyll a content (Chls a) of both sugarcane cultivars. ANOVA multifactorial of with four Al concentration, two Si levels and their interactions

Table S5 Chlorophyll b content (Chls b) of both sugarcane cultivars. ANOVA multifactorial with four Al concentrations, two Si levels and their interactions

Table S6 Carotenoids (Cars) of both sugarcane cultivars. ANOVA multifactorial with four Al concentration, two Si levels and their interactions

Table S7 Anthocyanins (Anths) content of both sugarcane cultivars. ANOVA multifactorial of with four Al concentration, two Si levels and their interactions

Table S8 Stomatal conductance ( $g_s$ ) of both sugarcane cultivars. ANOVA multifactorial with four Al concentration, two Si levels and their interactions

Table S9 Transpiration rate ( $E$ ) of both sugarcane cultivars. ANOVA multifactorial of with four Al concentration, two Si levels and their interactions

Table S10 CO<sub>2</sub> assimilation rate ( $A$ ) of both sugarcane cultivars. ANOVA multifactorial with four Al concentrations, two Si levels and their interactions

Table S11 Number of stomata adaxial of both sugarcane cultivars ANOVA multifactorial with four Al concentrations, two Si levels and their interactions

Table S12 Number of stomata abaxial of both sugarcane cultivars. ANOVA multifactorial with four Al concentrations, two Si levels and their interactions

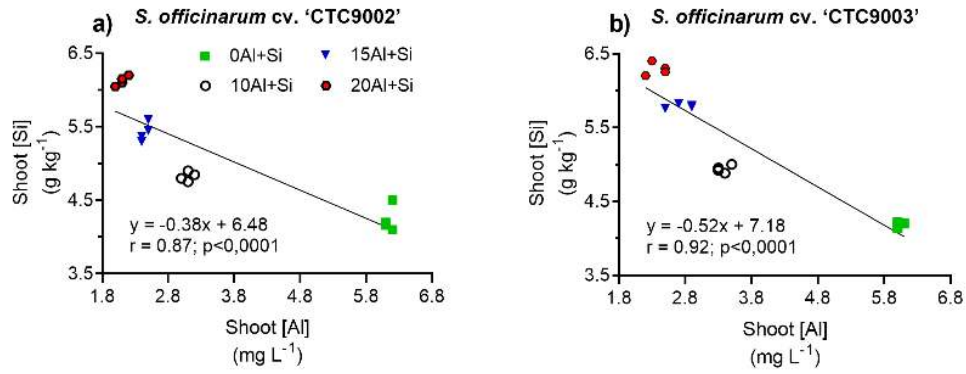

Fig S1 Correlation analysis between [Si] and [Al] in the aerial part of sugarcane seedlings in the cultivars 'CTC9002' a) and 'CTC9003' b). Treatments: without Al stress and Si addition (0Al+Si); with Al stress (10 mg L<sup>-1</sup>) and Si addition (2 mmol L<sup>-1</sup>) (10Al+Si); with Al stress (15 mg L<sup>-1</sup>) and Si addition (2 mmol L<sup>-1</sup>) (15Al+Si) and Al stress (20 mg L<sup>-1</sup>) and Si addition (2 mmol L<sup>-1</sup>) (20Al+Si)

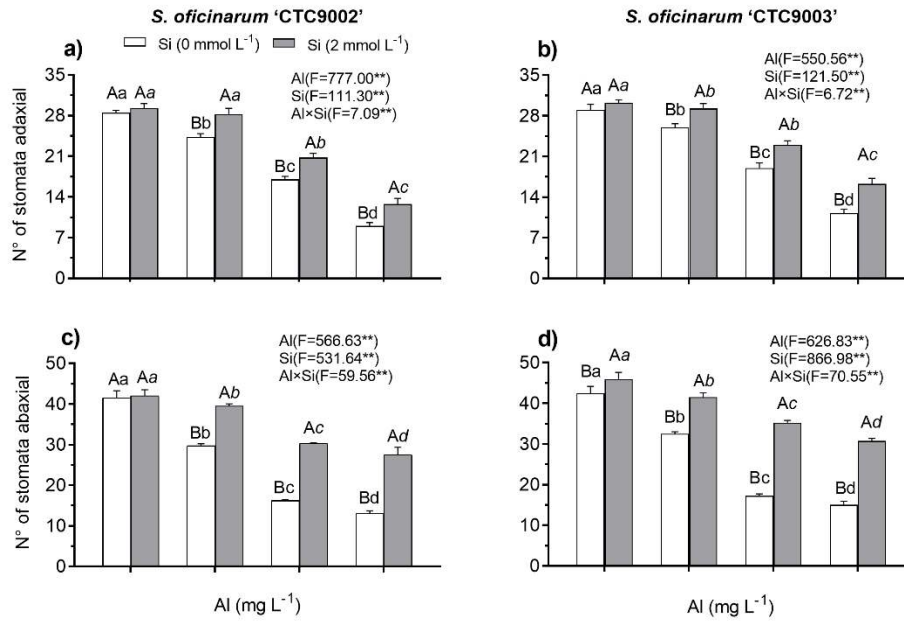

Fig S2 Number of stomata adaxial in cv 'CTC9002' (a) and cv 'CTC9003' (b) and number of stomata abaxial in cv 'CTC9002' (c) and cv 'CTC9003' (d). Treatments: without Al stress and Si addition (0Al+Si); with Al stress (10 mg L<sup>-1</sup>) and Si addition (2 mmol L<sup>-1</sup>) (10Al+Si); with Al stress (15 mg L<sup>-1</sup>) and Si addition (2 mmol L<sup>-1</sup>) (15Al+Si) and Al stress (20 mg L<sup>-1</sup>) and Si addition (2 mmol L<sup>-1</sup>) (20Al+Si). Data are the means (n=4) ± standard deviation (SD). Capital letters indicate differences between the absence and presence of Si in the same Al treatment; lower case normal letters indicate significant differences between Al treatments in the absence of Si and lower-case italic letters indicate statistical differences between Al concentrations in the presence of Si (2 mmol L<sup>-1</sup>), according to the t-student test (LSD) by ANOVA (p<0.05)

Table S1 Aerial dry mass of both sugarcane cultivars. ANOVA multifactorial with four Al concentrations, two Si levels and their interactions

| Aerial dry mass (g)   |    |        |       |                      |         |
|-----------------------|----|--------|-------|----------------------|---------|
| 'CTC9002'             |    |        |       |                      |         |
| Variation causes      | DF | SS     | MS    | F (DFn, DFd)         | P value |
| Al concentrations     | 3  | 130.77 | 43.59 | F (3, 21) = 197.35** | 0.0001  |
| Si supplementation    | 1  | 19.96  | 19.95 | F (1, 21) = 90.34**  | 0.0001  |
| Interaction (Al × Si) | 3  | 10.75  | 3.65  | F (3, 21) = 16.53**  | 0.0001  |
| Residual              | 21 | 4.64   | 0.22  |                      |         |
| 'CTC9003'             |    |        |       |                      |         |
| Variation causes      | DF | SS     | MS    | F (DFn, DFd)         | P value |
| Al concentrations     | 3  | 112.52 | 37.51 | F (3, 21) = 297.53** | 0.0001  |
| Si supplementation    | 1  | 21.13  | 21.13 | F (1, 21) = 167.58** | 0.0001  |
| Interaction (Al × Si) | 3  | 8.65   | 2.88  | F (3, 21) = 22.87**  | 0.0001  |
| Residual              | 21 | 2.64   | 0.12  |                      |         |

**Note:** \*: indicates significant at  $p < 0.05$  and \*\*: indicates significant at  $p < 0.01$ .

Table S2 Root dry mass of both sugarcane cultivars. ANOVA multifactorial with four Al concentrations, two Si levels and their interactions

| <b>Root dry mass (g)</b> |           |           |           |                      |                |
|--------------------------|-----------|-----------|-----------|----------------------|----------------|
| <b>'CTC9002'</b>         |           |           |           |                      |                |
| <b>Variation causes</b>  | <b>DF</b> | <b>SS</b> | <b>MS</b> | <b>F (DFn, DFd)</b>  | <b>P value</b> |
| Al concentrations        | 3         | 32.17     | 10.72     | F (3, 21) = 45.03**  | 0.0001         |
| Si supplementation       | 1         | 2.45      | 2.45      | F (1, 21) = 10.30**  | 0.0042         |
| Interaction (Al × Si)    | 3         | 1.22      | 0.41      | F (3, 21) = 11.71**  | 0.0002         |
| Residual                 | 21        | 5.00      | 0.24      |                      |                |
| <b>'CTC9003'</b>         |           |           |           |                      |                |
| <b>Variation causes</b>  | <b>DF</b> | <b>SS</b> | <b>MS</b> | <b>F (DFn, DFd)</b>  | <b>P value</b> |
| Al concentrations        | 3         | 29.29     | 9.76      | F (3, 21) = 121.63** | 0.0001         |
| Si supplementation       | 1         | 5.37      | 5.37      | F (1, 21) = 66.91**  | 0.0001         |
| Interaction (Al × Si)    | 3         | 1.47      | 0.49      | F (3, 21) = 6.11**   | 0.0037         |
| Residual                 | 21        | 1.69      | 0.08      |                      |                |

**Note:** \*: indicates significant at  $p < 0.05$  and \*\*: indicates significant at  $p < 0.01$ .

Table S3 Leaf area of both sugarcane cultivars. ANOVA multifactorial with four Al concentrations, two Si levels and their interactions

| Leaf area (cm <sup>2</sup> ) |    |           |          |                       |         |
|------------------------------|----|-----------|----------|-----------------------|---------|
| 'CTC9002'                    |    |           |          |                       |         |
| Variation causes             | DF | SS        | MS       | F (DFn, DFd)          | P value |
| Al concentrations            | 3  | 1059751.0 | 353250.3 | F (3, 21) = 4469.50** | 0.0001  |
| Si supplementation           | 1  | 68635.13  | 68635.13 | F (1, 21) = 868.41**  | 0.0001  |
| Interaction (Al × Si)        | 3  | 23040.38  | 7680.13  | F (3, 21) = 97.17**   | 0.0001  |
| Residual                     | 21 | 1659.75   | 79.04    |                       |         |
| 'CTC9003'                    |    |           |          |                       |         |
| Variation causes             | DF | SS        | MS       | F (DFn, DFd)          | P value |
| Al concentrations            | 3  | 963767.7  | 321255.7 | F (3, 21) = 8200.72** | 0.0001  |
| Si supplementation           | 1  | 76342.78  | 76342.78 | F (1, 21) = 1948.81** | 0.0001  |
| Interaction (Al × Si)        | 3  | 27033.34  | 9011.11  | F (3, 21) = 230.03**  | 0.0001  |
| Residual                     | 21 | 822.66    | 39.17    |                       |         |

**Note:** \*: indicates significant at  $p < 0.05$  and \*\*: indicates significant at  $p < 0.01$ .

Table S4 Chlorophyll a content (Chls a) of both sugarcane cultivars. ANOVA multifactorial of with four Al concentration, two Si levels and their interactions

| <b>Chls a</b>           |           |           |           |                      |                |
|-------------------------|-----------|-----------|-----------|----------------------|----------------|
| <b>'CTC9002'</b>        |           |           |           |                      |                |
| <b>Variation causes</b> | <b>DF</b> | <b>SS</b> | <b>MS</b> | <b>F (DFn, DFd)</b>  | <b>P value</b> |
| Al concentrations       | 3         | 20.21     | 6.74      | F (3, 21) = 862.94** | 0.0001         |
| Si supplementation      | 1         | 4.81      | 4.81      | F (1, 21) = 616.49** | 0.0001         |
| Interaction (Al × Si)   | 3         | 4.66      | 1.55      | F (3, 21) = 199.06** | 0.0001         |
| Residual                | 21        | 0.16      | 0.01      |                      |                |
| <b>'CTC9003'</b>        |           |           |           |                      |                |
| <b>Variation causes</b> | <b>DF</b> | <b>SS</b> | <b>MS</b> | <b>F (DFn, DFd)</b>  | <b>P value</b> |
| Al concentrations       | 3         | 10.90     | 3.63      | F (3, 21) = 339.16** | 0.0001         |
| Si supplementation      | 1         | 5.19      | 5.19      | F (1, 21) = 484.74** | 0.0001         |
| Interaction (Al × Si)   | 3         | 4.52      | 1.51      | F (3, 21) = 140.53** | 0.0001         |
| Residual                | 21        | 0.22      | 0.01      |                      |                |

**Note:** \*: indicates significant at  $p < 0.05$  and \*\*: indicates significant at  $p < 0.01$ .

Table S5 Chlorophyll b content (Chls b) of both sugarcane cultivars. ANOVA multifactorial with four Al concentrations, two Si levels and their interactions

| <b>Chls b</b>           |           |           |           |                       |                |
|-------------------------|-----------|-----------|-----------|-----------------------|----------------|
| <b>'CTC9002'</b>        |           |           |           |                       |                |
| <b>Variation causes</b> | <b>DF</b> | <b>SS</b> | <b>MS</b> | <b>F (DFn, DFd)</b>   | <b>P value</b> |
| Al concentrations       | 3         | 21.98     | 7.33      | F (3, 21) = 2227.68** | 0.0001         |
| Si supplementation      | 1         | 6.04      | 6.04      | F (1, 21) = 1835.93** | 0.0001         |
| Interaction (Al × Si)   | 3         | 2.29      | 0.76      | F (3, 21) = 231.95**  | 0.0001         |
| Residual                | 21        | 0.07      | 0.003     |                       |                |
| <b>'CTC9003'</b>        |           |           |           |                       |                |
| <b>Variation causes</b> | <b>DF</b> | <b>SS</b> | <b>MS</b> | <b>F (DFn, DFd)</b>   | <b>P value</b> |
| Al concentrations       | 3         | 15.66     | 5.22      | F (3, 21) = 1865.43** | 0.0001         |
| Si supplementation      | 1         | 4.35      | 4.35      | F (1, 21) = 1555.34** | 0.0001         |
| Interaction (Al × Si)   | 3         | 2.02      | 0.67      | F (3, 21) = 240.23**  | 0.0001         |
| Residual                | 21        | 0.06      | 0.002     |                       |                |

**Note:** \*: indicates significant at  $p < 0.05$  and \*\*: indicates significant at  $p < 0.01$ .

Table S6 Carotenoids (Cars) of both sugarcane cultivars. ANOVA multifactorial with four Al concentration, two Si levels and their interactions

| <b>Cars</b>             |           |           |           |                      |                |
|-------------------------|-----------|-----------|-----------|----------------------|----------------|
| <b>'CTC9002'</b>        |           |           |           |                      |                |
| <b>Variation causes</b> | <b>DF</b> | <b>SS</b> | <b>MS</b> | <b>F (DFn, DFd)</b>  | <b>P value</b> |
| Al concentrations       | 3         | 11.93     | 3.98      | F (3, 21) = 710.72** | 0.0001         |
| Si supplementation      | 1         | 2.76      | 2.76      | F (1, 21) = 493.50** | 0.0001         |
| Interaction (Al × Si)   | 3         | 1.33      | 0.44      | F (3, 21) = 79.46**  | 0.0001         |
| Residual                | 21        | 0.12      | 0.01      |                      |                |
| <b>'CTC9003'</b>        |           |           |           |                      |                |
| <b>Variation causes</b> | <b>DF</b> | <b>SS</b> | <b>MS</b> | <b>F (DFn, DFd)</b>  | <b>P value</b> |
| Al concentrations       | 3         | 10.83     | 3.61      | F (3, 21) = 412.62** | 0.0001         |
| Si supplementation      | 1         | 2.00      | 2.00      | F (1, 21) = 228.57** | 0.0001         |
| Interaction (Al × Si)   | 3         | 1.62      | 0.54      | F (3, 21) = 61.81**  | 0.0001         |
| Residual                | 21        | 0.18      | 0.01      |                      |                |

**Note:** \*: indicates significant at  $p < 0.05$  and \*\*: indicates significant at  $p < 0.01$ .

Table S7 Anthocyanins (Anths) content of both sugarcane cultivars. ANOVA multifactorial of with four Al concentration, two Si levels and their interactions

| <b>Anths</b>            |           |           |           |                      |                |
|-------------------------|-----------|-----------|-----------|----------------------|----------------|
| <b>'CTC9002'</b>        |           |           |           |                      |                |
| <b>Variation causes</b> | <b>DF</b> | <b>SS</b> | <b>MS</b> | <b>F (DFn, DFd)</b>  | <b>P value</b> |
| Al concentrations       | 3         | 0.002     | 0.0008    | F (3, 21) = 523.64** | 0.0001         |
| Si supplementation      | 1         | 0.0002    | 0.0002    | F (1, 21) = 96.35**  | 0.0001         |
| Interaction (Al × Si)   | 3         | 0.00007   | 0.00002   | F (3, 21) = 14.92**  | 0.0001         |
| Residual                | 21        | 0.00003   | 0.000002  |                      |                |

  

| <b>'CTC9003'</b>        |           |           |           |                      |                |
|-------------------------|-----------|-----------|-----------|----------------------|----------------|
| <b>Variation causes</b> | <b>DF</b> | <b>SS</b> | <b>MS</b> | <b>F (DFn, DFd)</b>  | <b>P value</b> |
| Al concentrations       | 3         | 0.002     | 0.0005    | F (3, 21) = 598.52** | 0.0001         |
| Si supplementation      | 1         | 0.0001    | 0.0001    | F (1, 21) = 128.57** | 0.0001         |
| Interaction (Al × Si)   | 3         | 0.00005   | 0.00002   | F (3, 21) = 18.95**  | 0.0001         |
| Residual                | 21        | 0.00002   | 0.000001  |                      |                |

**Note:** \*: indicates significant at  $p < 0.05$  and \*\*: indicates significant at  $p < 0.01$ .

**Table S8** Stomatal conductance (*gs*) of both sugarcane cultivars. ANOVA multifactorial with four Al concentration, two Si levels and their interactions

| <i>gs</i>             |    |       |        |                       |         |
|-----------------------|----|-------|--------|-----------------------|---------|
| 'CTC9002'             |    |       |        |                       |         |
| Variation causes      | DF | SS    | MS     | F (DFn, DFd)          | P value |
| Al concentrations     | 3  | 1.72  | 0.57   | F (3, 21) = 1644.15** | 0.0001  |
| Si supplementation    | 1  | 0.01  | 0.01   | F (1, 21) = 35.73**   | 0.0001  |
| Interaction (Al × Si) | 3  | 0.02  | 0.005  | F (3, 21) = 15.08**   | 0.0001  |
| Residual              | 21 | 0.007 | 0.0003 |                       |         |

  

| 'CTC9003'             |    |      |       |                      |         |
|-----------------------|----|------|-------|----------------------|---------|
| Variation causes      | DF | SS   | MS    | F (DFn, DFd)         | P value |
| Al concentrations     | 3  | 2.76 | 0.92  | F (3, 21) = 529.16** | 0.0001  |
| Si supplementation    | 1  | 0.09 | 0.09  | F (1, 21) = 53.21**  | 0.0001  |
| Interaction (Al × Si) | 3  | 0.10 | 0.03  | F (3, 21) = 18.63**  | 0.0001  |
| Residual              | 21 | 0.03 | 0.002 |                      |         |

**Note:** \*: indicates significant at  $p < 0.05$  and \*\*: indicates significant at  $p < 0.01$ .

**Table S9** Transpiration rate (*E*) of both sugarcane cultivars. ANOVA multifactorial of with four Al concentration, two Si levels and their interactions

| <i>E</i>              |    |      |       |                      |         |
|-----------------------|----|------|-------|----------------------|---------|
| 'CTC9002'             |    |      |       |                      |         |
| Variation causes      | DF | SS   | MS    | F (DFn, DFd)         | P value |
| Al concentrations     | 3  | 2.95 | 0.98  | F (3, 21) = 149.21** | 0.0001  |
| Si supplementation    | 1  | 0.14 | 0.14  | F (1, 21) = 21.15**  | 0.0001  |
| Interaction (Al × Si) | 3  | 0.02 | 0.006 | F (3, 21) = 6.94**   | 0.0001  |
| Residual              | 21 | 0.14 | 0.007 |                      |         |
| 'CTC9003'             |    |      |       |                      |         |
| Variation causes      | DF | SS   | MS    | F (DFn, DFd)         | P value |
| Al concentrations     | 3  | 2.54 | 0.85  | F (3, 21) = 119.88** | 0.0001  |
| Si supplementation    | 1  | 0.17 | 0.17  | F (1, 21) = 23.64**  | 0.0001  |
| Interaction (Al × Si) | 3  | 0.04 | 0.01  | F (3, 21) = 11.89**  | 0.0001  |
| Residual              | 21 | 0.15 | 0.007 |                      |         |

**Note:** \*: indicates significant at  $p < 0.05$  and \*\*: indicates significant at  $p < 0.01$ .

**Table S10** CO<sub>2</sub> assimilation rate (*A*) of both sugarcane cultivars. ANOVA multifactorial with four Al concentrations, two Si levels and their interactions

| <i>A</i>              |    |       |       |                       |         |
|-----------------------|----|-------|-------|-----------------------|---------|
| 'CTC9002'             |    |       |       |                       |         |
| Variation causes      | DF | SS    | MS    | F (DFn, DFd)          | P value |
| Al concentrations     | 3  | 52.87 | 17.62 | F (3, 21) = 4146.28** | 0.0001  |
| Si supplementation    | 1  | 15.10 | 15.10 | F (1, 21) = 3551.86** | 0.0001  |
| Interaction (Al × Si) | 3  | 7.35  | 2.45  | F (3, 21) = 576.59**  | 0.0001  |
| Residual              | 21 | 0.09  | 0.004 |                       |         |
| 'CTC9003'             |    |       |       |                       |         |
| Variation causes      | DF | SS    | MS    | F (DFn, DFd)          | P value |
| Al concentrations     | 3  | 40.67 | 13.56 | F (3, 21) = 878.47**  | 0.0001  |
| Si supplementation    | 1  | 14.72 | 14.72 | F (1, 21) = 953.59**  | 0.0001  |
| Interaction (Al × Si) | 3  | 6.74  | 2.24  | F (3, 21) = 145.50**  | 0.0001  |
| Residual              | 21 | 0.32  | 0.02  |                       |         |

**Note:** \*: indicates significant at  $p < 0.05$  and \*\*: indicates significant at  $p < 0.01$ .

**Table S11** Number of stomata adaxial of both sugarcane cultivars ANOVA multifactorial with four Al concentrations, two Si levels and their interactions

| <i>Number of stomata adaxial</i> |           |           |           |                      |                |
|----------------------------------|-----------|-----------|-----------|----------------------|----------------|
| <b>'CTC9002'</b>                 |           |           |           |                      |                |
| <b>Variation causes</b>          | <b>DF</b> | <b>SS</b> | <b>MS</b> | <b>F (DFn, DFd)</b>  | <b>P value</b> |
| Al concentrations                | 3         | 1571.34   | 523.78    | F (3, 21) = 777.00** | 0.0001         |
| Si supplementation               | 1         | 75.03     | 75.03     | F (1, 21) = 111.30** | 0.0001         |
| Interaction (Al × Si)            | 3         | 14.34     | 4.78      | F (3, 21) = 7.09**   | 0.0001         |
| Residual                         | 21        | 14.16     | 0.67      |                      |                |
| <b>'CTC9003'</b>                 |           |           |           |                      |                |
| <b>Variation causes</b>          | <b>DF</b> | <b>SS</b> | <b>MS</b> | <b>F (DFn, DFd)</b>  | <b>P value</b> |
| Al concentrations                | 3         | 1238.75   | 412.92    | F (3, 21) = 550.56** | 0.0001         |
| Si supplementation               | 1         | 91.13     | 91.13     | F (1, 21) = 121.50** | 0.0001         |
| Interaction (Al × Si)            | 3         | 15.13     | 5.04      | F (3, 21) = 6.72**   | 0.0024         |
| Residual                         | 21        | 15.75     | 0.75      |                      |                |

**Note:** \*: indicates significant at  $p < 0.05$  and \*\*: indicates significant at  $p < 0.01$ .

**Table S12** Number of stomata abaxial of both sugarcane cultivars. ANOVA multifactorial with four Al concentrations, two Si levels and their interactions

| <i>Number of stomata abaxial</i> |           |           |           |                      |                |
|----------------------------------|-----------|-----------|-----------|----------------------|----------------|
| <b>'CTC9002'</b>                 |           |           |           |                      |                |
| <b>Variation causes</b>          | <b>DF</b> | <b>SS</b> | <b>MS</b> | <b>F (DFn, DFd)</b>  | <b>P value</b> |
| Al concentrations                | 3         | 2400.59   | 800.20    | F (3, 21) = 566.63** | 0.0001         |
| Si supplementation               | 1         | 750.78    | 750.78    | F (1, 21) = 531.64** | 0.0001         |
| Interaction (Al × Si)            | 3         | 252.34    | 84.11     | F (3, 21) = 59.56**  | 0.0001         |
| Residual                         | 21        | 29.66     | 1.41      |                      |                |
| <b>'CTC9003'</b>                 |           |           |           |                      |                |
| <b>Variation causes</b>          | <b>DF</b> | <b>SS</b> | <b>MS</b> | <b>F (DFn, DFd)</b>  | <b>P value</b> |
| Al concentrations                | 3         | 2319.84   | 773.28    | F (3, 21) = 626.83** | 0.0001         |
| Si supplementation               | 1         | 1069.53   | 1069.53   | F (1, 21) = 866.98** | 0.0001         |
| Interaction (Al × Si)            | 3         | 261.09    | 87.03     | F (3, 21) = 70.55**  | 0.0001         |
| Residual                         | 21        | 25.91     | 1.23      |                      |                |

**Note:** \*: indicates significant at  $p < 0.05$  and \*\*: indicates significant at  $p < 0.01$ .
